# Supplementary material for: Design of a dual-signal sensing platform for d-penicillamine based on UiO-66-NH2 MOFs and APBA@Alizarin Red
Source: Royal Society of Chemistry journal article supplement (doi:10.1039/d1an01013a), 2021-01-01
Supplement: d1an01013a1.pdf [file d1an01013a1.pdf]

## Supporting Information

### Design of dual-signal sensing platform for D-penicillamine based on UiO-66-NH<sub>2</sub> MOFs and APBA @Alizarin Red

Nan Wang<sup>a</sup>, Youwei Wu<sup>a</sup>, Mengke Wang<sup>a</sup>, Zhengxuan Li<sup>b</sup>, Guannan Wang<sup>c</sup>, Xingguang

Su<sup>a,\*</sup>

*a. Department of Analytical Chemistry, College of Chemistry, Jilin University, Changchun 130012, China*

*b. State Key Lab of Supramolecular Structure and Materials, College of Chemistry, Jilin University, Changchun,  
130012, P. R. China.*

*c. College of Medical Engineering, Jining Medical University, Jining, 272067, China*

\*Corresponding author

Tel.: +86-431-85168352

*E-mail address: [suxg@jlu.edu.cn](mailto:suxg@jlu.edu.cn)*

## Chemicals

The chemical reagents used in the experiments are of analytical grade without further purification. The deionized water used in this experiment has a resistivity greater than  $18 \text{ M}\Omega \text{ cm}^{-1}$ .  $\text{ZrCl}_4$ , Tris-HCl and 2-aminoterephthalic acid were purchased from Sinopharm Chemical Reagent Co. Ltd. Alizarin Red (ARS), 3-aminophenylboronic acid (APBA) and D-Penicillamine (D-PA) were purchased from Shanghai Aladdin Co. Ltd. NaCl, KCl,  $\text{NH}_4\text{Cl}$ ,  $\text{CuCl}_2$ , KSCN, DMF and EtOH were purchased from Tianjin Guangfu Institute of Fine Chemicals. Glucose, Proline, Threonine, Tyrosine, Glycine and Phenylalanine were purchased from Beijing Dingguo Biotechnology Co. Ltd. This experiment used 10 mM Tris-HCl buffer solution to adjust the pH of the reaction solution.

## Instrumentation

Fluorescence spectral data were obtained from a Shimadzu RF-5301PC spectrofluorometer instrument equipped with a xenon lamp, and the data were measured using a quartz cuvette with an optical path length of 1 cm (Shimadzu Co., Kyoto, Japan). UV-visible absorption spectroscopy data were obtained by testing with a Varian GBC Cintra 10e UV-Vis spectrometer (Japan). Scanning electron microscope (SEM) experiment was performed on a JF6700 scanning electron Microscope (JEOL Ltd, Japan). Fourier transform infrared spectroscopy data were measured by using a Bruker IFS66V FT-IR spectrometer equipped with a DGTS detector (32 scans) (Germany). Powder X-ray diffraction (XRD) patterns of MOF

were obtained using a D/max 2550 VB/PC diffractometer with Cu K $\alpha$  radiation ( $\lambda = 1.5406 \text{ \AA}$ ) (Rigaku, Japan). All pH measurements and the configured buffer solutions were performed using a PHS-3C pH meter (Tuopu Co., Hangzhou, China). Transmission Electron Microscopy (TEM) was obtained by Hitachi H-800 electron microscope using an accelerating voltage of 300 KeV (<http://www.hitachi.com.cn/>).

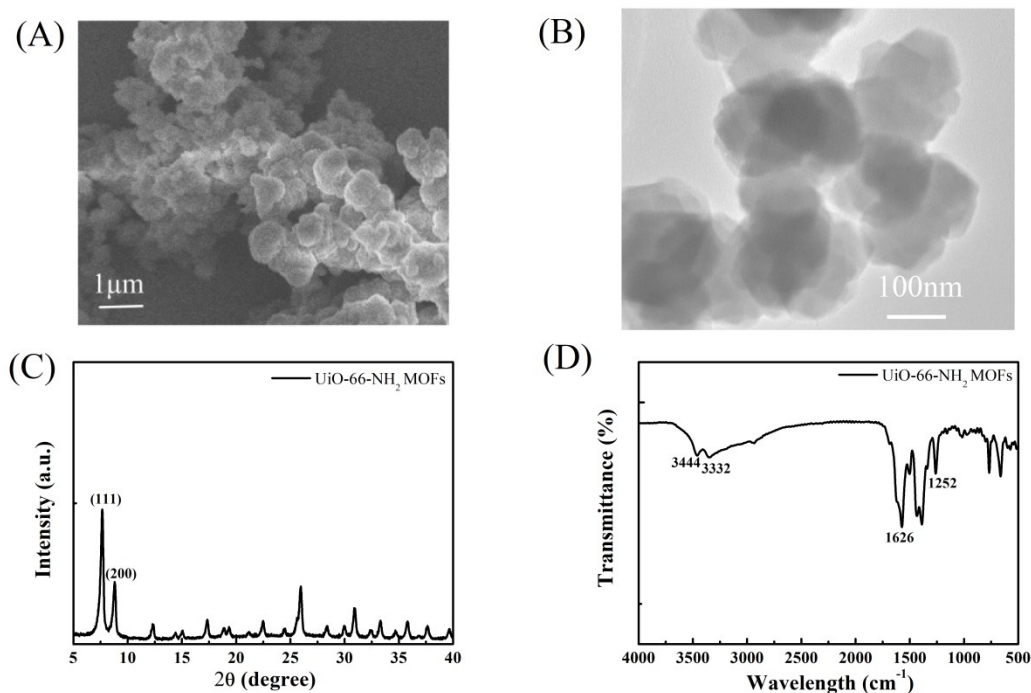

**Fig. S1**(A) The SEM image,(B) The TEM image, (C)The XRD, (D) The FT-IR spectra of UiO-66-NH<sub>2</sub> MOFs.

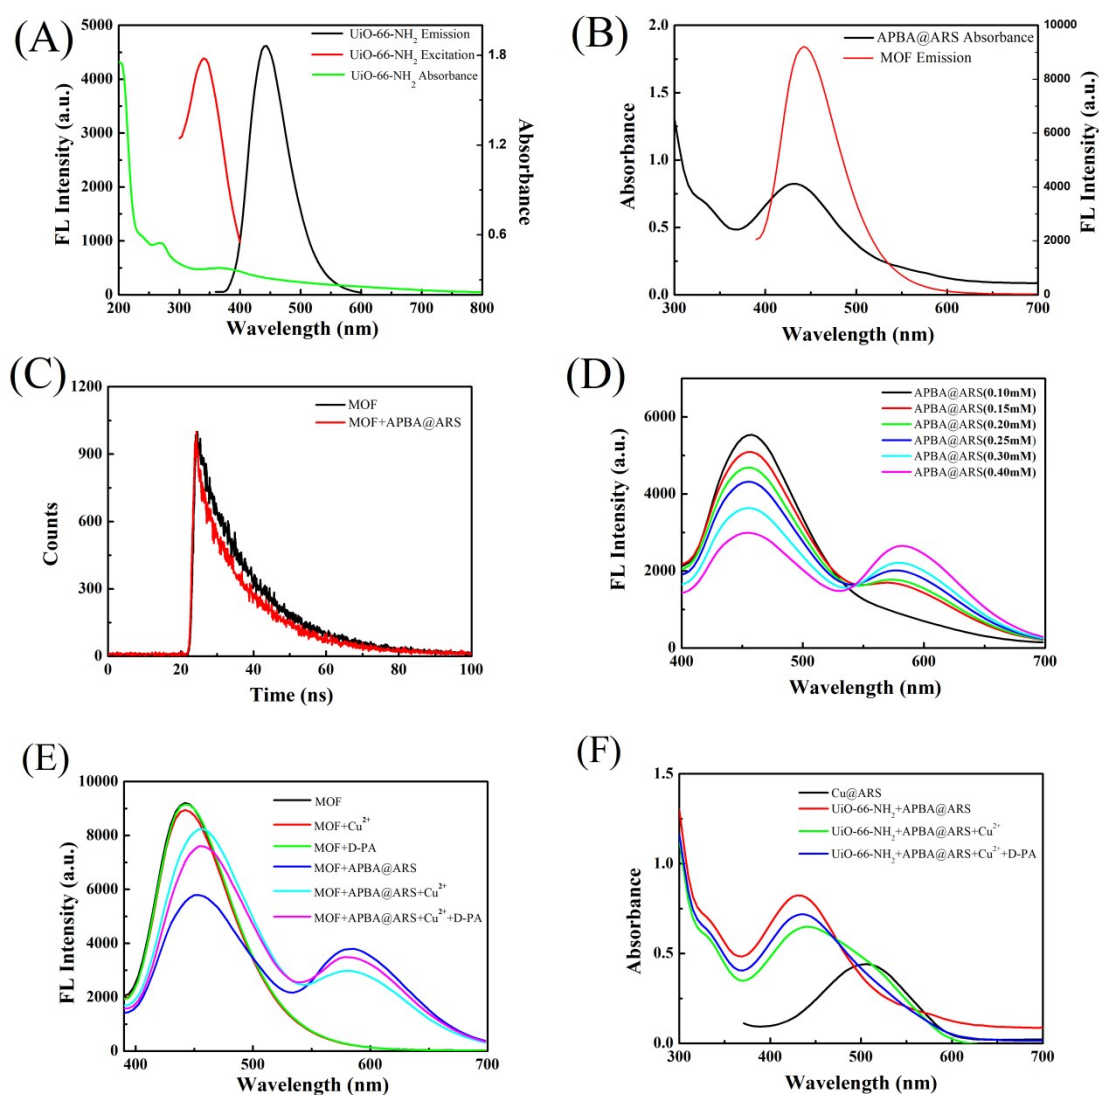

**Fig. S2** (A) UV-vis absorption spectra, fluorescence excitation and emission spectra of UiO-66-NH<sub>2</sub> MOFs. (B) Fluorescence emission spectrum of UiO-66-NH<sub>2</sub> MOFs and UV absorption spectrum of APBA@ARS. (C) Fluorescence lifetime spectra of UiO-66-NH<sub>2</sub> MOFs and UiO-66-NH<sub>2</sub> MOFs/APBA@ARS. (D) The fluorescence emission spectra of UiO-66-NH<sub>2</sub> MOFs and APBA@ARS mixing system with different APBA@ARS concentration, 0.2mg/ml UiO-66-NH<sub>2</sub> MOFs. (E) Fluorescence emission spectra of MOF, MOF/Cu<sup>2+</sup>, MOF/D-PA, MOF/APBA@ARS, MOF/APBA@ARS/Cu<sup>2+</sup>, MOF/APBA@ARS/Cu<sup>2+</sup>+D-PA system. (F) The UV-vis absorption spectra of Cu@ARS, UiO-66-NH<sub>2</sub> MOFs+APBA@ARS, UiO-66-NH<sub>2</sub> MOFs+APBA@ARS+Cu<sup>2+</sup>, UiO-66-NH<sub>2</sub> MOFs+APBA@ARS+Cu<sup>2+</sup>+D-PA system.

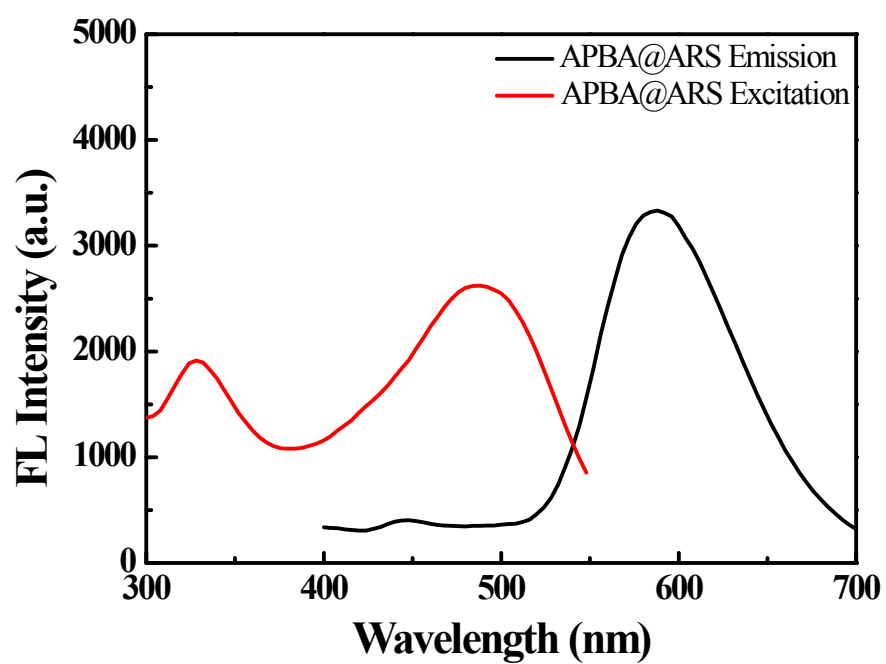

**Fig.S3** Fluorescence excitation and emission spectra of APBA@ARS.

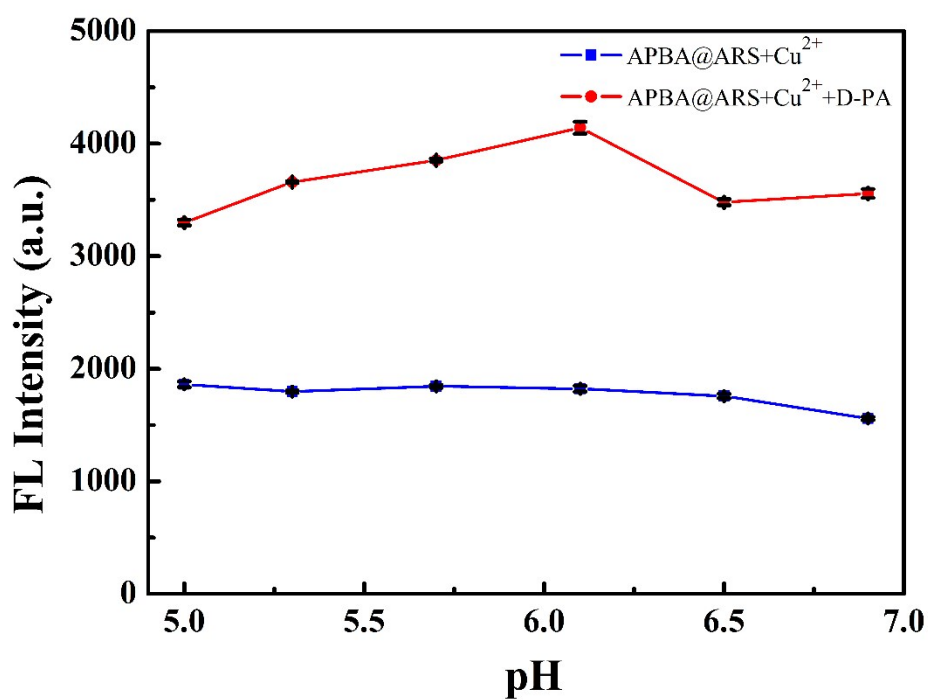

**Fig.S4** The effect of pH on the fluorescence intensity of APBA@ARS+Cu<sup>2+</sup>, APBA@ARS+Cu<sup>2+</sup>+D-PA.

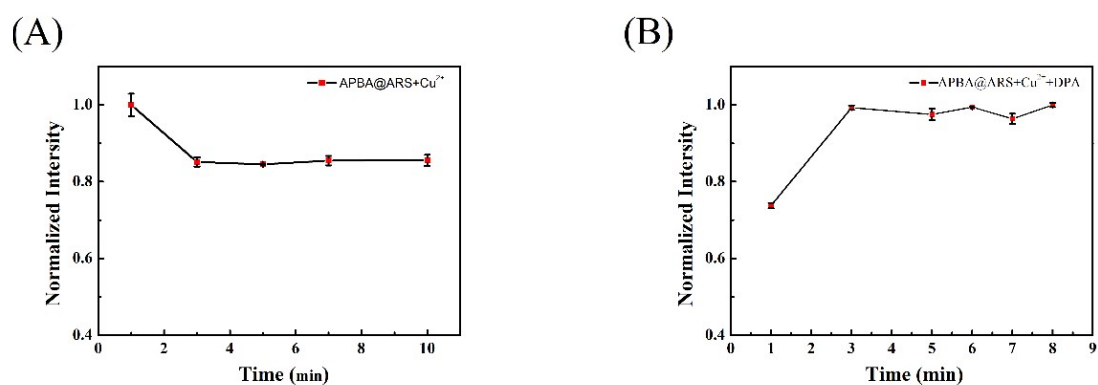

**Fig.S5** The effect of reactiontime on the fluorescence intensity of APBA@ARS+Cu<sup>2+</sup>, APBA@ARS+Cu<sup>2+</sup>+D-PA.

**Table S1.** Comparison of our method with the previous methods for the detection of D-penicillamine

| Methods               | Materials                                   | Linear range ( $\mu\text{M}$ ) | LOD ( $\mu\text{M}$ ) | Reference |
|-----------------------|---------------------------------------------|--------------------------------|-----------------------|-----------|
| Spectrophotometric    | $\text{Ni}^{2+}$                            | 3.0 – 200                      | 0.89                  | [1]       |
| Fluorescence          | BSA-stabilized AuNCs                        | 20 – 239                       | 5.4                   | [2]       |
| Fluorescence          | GQDs @ $\text{Pb}^{2+}$                     | 0.6 – 50                       | 0.47                  | [3]       |
| Electrochemical assay | MIP-GCE                                     | 10.0 – 480.0                   | 3.5                   | [4]       |
| Fluorescence          | UiO-66- $\text{NH}_2$ and APBA@Alizarin Red | 1–20                           | 0.46                  | This work |
| colorimetric          |                                             | 2 – 50                         | 1.38                  |           |

## References

- [1] A. Martinovic-Bevanda, N. Radic, *Anal. Sci.*, 2013, **29**, 669-671.
- [2] P. Wang, B.L. Li, N.B. Li, H.Q. Luo, *Spectrochim Acta A Mol Biomol Spectrosc*, 2015, **135**, 198-202.
- [3] Q. Wang, L. Li, T. Wu, X. Kong, Q. Ma, C. Ma, *Spectrochim Acta A Mol Biomol Spectrosc*, 2019, 117924.
- [4] B.L. Li, J.H. Luo, H.Q. Luo, N.B. Li, *Sensors and Actuators B: Chemical*, 2013, **186**, 96-102.
